# Supplementary material
Source: HighWire-hosted journal article supplement (https://www.cmajopen.ca/highwire/filestream/81323/field_highwire_adjunct_files/2/2018-0185-3-at.pdf)

### Appendix 3 (as supplied by the authors): Predictive accuracy of the models

The models were able to predict the number of events (i.e., IHs) for subgroups of patients with a high degree of accuracy according to the plots below. This supports a good fit of the models.

#### A. Index hospitalization – HCU

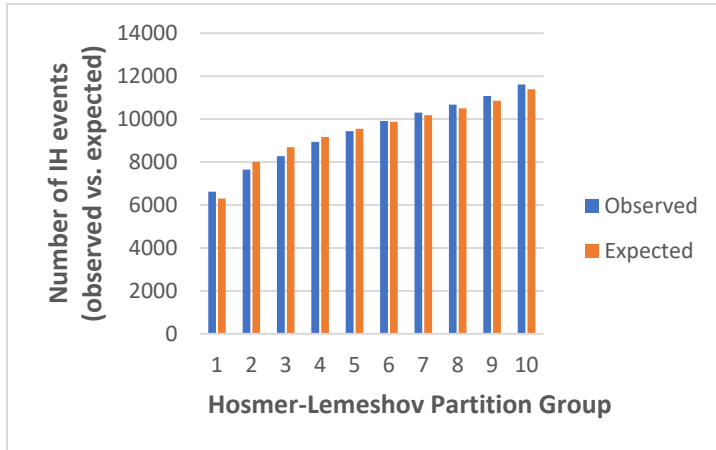

#### B. Index hospitalization – non-HCU

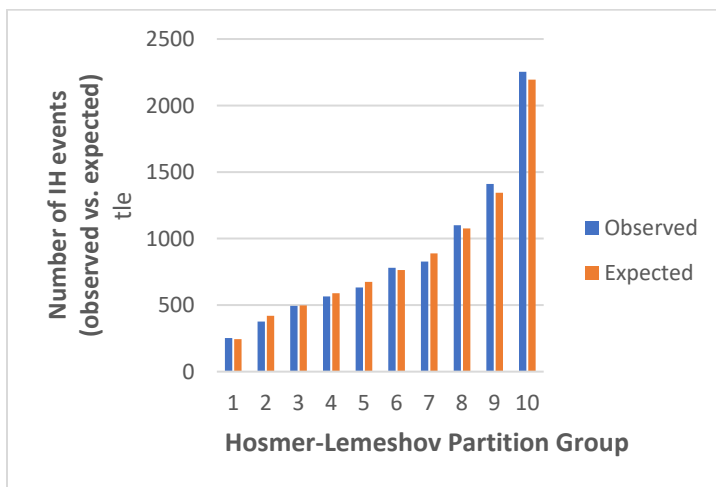

Supplement: 2018-0185-3-at.pdf [file 2018-0185-3-at.pdf]
